# Supplementary material for: iPSC‐Derived Retinal Pigment Epithelium Allografts Do Not Elicit Detrimental Effects in Rats: A Follow‐Up Study
Source: Hindawi journal article supplement (doi:10.1155/2016/8470263), 2016-01-01
Supplement: f1 [file 8470263.f1.pdf]

| <b><i>Uninjected</i></b>        |            |                                                    |                     |
|---------------------------------|------------|----------------------------------------------------|---------------------|
| <b>Age</b>                      | <b>Sex</b> | <b>Observation</b>                                 | <b>Location</b>     |
| 0 y 4 m                         | Female     | Alopecia/Pruritus/Dermatitis                       | back                |
| 0 y 4 m                         | Female     | Alopecia/Pruritus/Dermatitis                       | rear dorsum         |
| 0 y 5 m                         | Female     | Eye closed/discharge                               | right eye           |
| 0 y 5 m                         | Female     | Eye closed/discharge                               | right eye           |
| 0 y 6 m                         | Female     | Eye closed/discharge                               | left eye            |
| 0 y 6 m                         | Male       | Found Dead                                         |                     |
| 0 y 7 m                         | Female     | Neoplasm                                           | by front limbs      |
| 0 y 7 m                         | Male       | Not Drinking/Dehydrated                            |                     |
| 0 y 11 m                        | Female     | Eye closed/discharge                               | right eye           |
| 0 y 11 m                        | Female     | Eye closed/discharge                               | left eye            |
| 1 y 0 m                         | Female     | Found Dead                                         |                     |
| 1 y 1 m                         | Female     | Lame/Lethargic/Unthrifty                           | right forelimb      |
| 1 y 3 m                         | Female     | Neoplasm                                           | inguinal-left side  |
| 1 y 4 m                         | Female     | Neoplasm                                           | abdominal area      |
| <b><i>iPSC-RPE injected</i></b> |            |                                                    |                     |
| <b>Age</b>                      | <b>Sex</b> | <b>Observation</b>                                 | <b>Location</b>     |
| 0 y 3 m                         | Female     | Lesions--cut, gash, wound, etc.                    | left side           |
| 1 y 0 m                         | Female     | Eye closed/discharge                               | left (uninj) eye    |
| 1 y 4 m                         | Female     | Neoplasm                                           | axillary-right side |
| 1 y 4 m                         | Female     | Hunched/Ruffled Coat/labored breathing/weight loss |                     |
| 1 y 5 m                         | Male       | Swollen foot                                       | left rear foot      |
| 1 y 5 m                         | Female     | Eye closed/discharge                               | left (uninj) eye    |
| 1 y 5 m                         | Female     | Eye closed/discharge                               | right (inj) eye     |
| 1 y 10 m                        | Female     | Eye closed/discharge                               | left (uninj) eye    |
| 2 y 1 m                         | Male       | Porphyrin                                          | left (uninj) eye    |

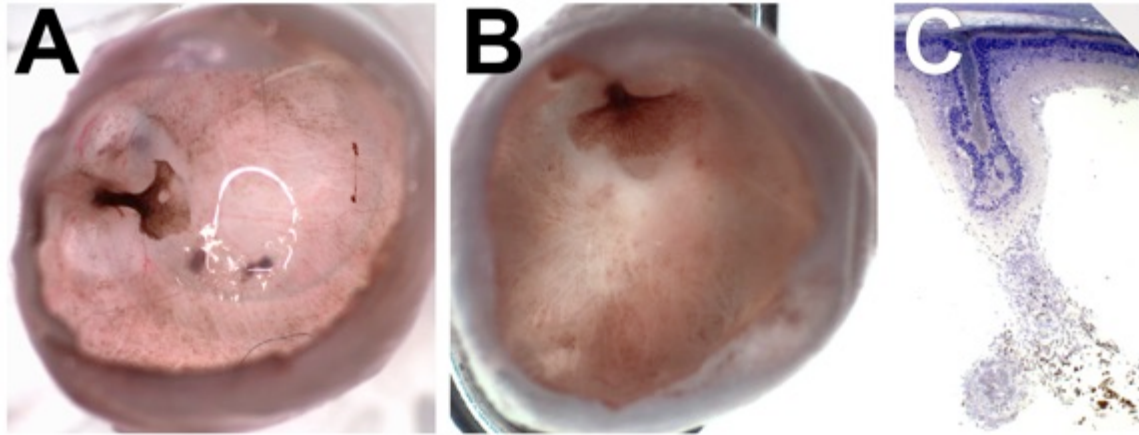

**SI Figure 1**

**SI Table 1. Summary of the filed health and daily behavior reports.** All the reports were collected and listed by age.

**SI Fig. 1. Occasional complications of injecting suspensions of iPS-RPE.** (A-C)

Reflux of RPE cells and acute damage to the retina at the injection site. (A&B)

Pigmented cells can be seen in a “spout” in the vitreous of enucleated eyes. (C)

Histology shows damage at the injected site and accumulations of pigment-laden cells in the vitreous.
